# Supplementary material
Source: PubMed Central journal article supplement (PMC5605289)
Supplement: NIHMS881479-supplement-S1.pdf [file NIHMS881479-supplement-S1.pdf]

## SUPPLEMENTARY MATERIAL

### **Biologically active new metabolites from a Florida collection of *Moorea producens***

**Omar M. M. Sabry<sup>1,2\*</sup>, Douglas E. Goeger<sup>1</sup> and William H. Gerwick<sup>1,3</sup>**

<sup>1</sup>College of Pharmacy, Oregon State University, Corvallis, Oregon 97331, USA

\*<sup>2</sup>Faculty of Pharmacy, Cairo University, Cairo 11562, Egypt.

<sup>3</sup>Center for Marine Biotechnology and Biomedicine, Scripps Institution of Oceanography,

University of California, San Diego, La Jolla, CA 92093, USA

**Abstract:** A bioassay guided investigation (cancer cell cytotoxicity) of a *Moorea producens* collection from Key West, Florida, led to the discovery of two new bioactive natural products [(+)-malyngamide Y and a cyclic depsipeptide, (+)-floridamide]. Their planar structures were deduced through extensive analysis of 1D and 2D NMR spectroscopic data and supported by HRFAB mass spectrometry. The new cyclic depsipeptide contains four amino acids units, including N-methyl phenylalanine (N-MePhe), proline (Pro), valine (Val) and alanine (Ala), beside the unique unit, 2,2-dimethyl-3-hydroxy-octanoic acid (Dhoaa). In addition to the discovery of these two new compounds, two previously reported metabolites were also isolated and identified from this cyanobacterial collection; (-)-C-12 lyngbic acid and the antibacterial agent (-)-malyngolide.

**S1** <sup>1</sup>H NMR spectrum of compound **1** in CDCl<sub>3</sub>

**S2** COSY spectrum of compound **1** in CDCl<sub>3</sub>

**S3** TOCSY spectrum of compound **1** in CDCl<sub>3</sub>

**S4** <sup>13</sup>C NMR spectrum of compound **1** in CDCl<sub>3</sub>

**S5** HSQC spectrum of compound **1** in CDCl<sub>3</sub>

**S6** HMBC spectrum of compound **1** in CDCl<sub>3</sub>

**S7** COSY spectrum of compound **2** in CDCl<sub>3</sub>

**S8** TOCSY spectrum of compound **2** in CDCl<sub>3</sub>

**S9** <sup>13</sup>C NMR spectrum of compound **2** in CDCl<sub>3</sub>

**S10** HSQC spectrum of compound **2** in CDCl<sub>3</sub>

**S11** CIMS fragmentation observed for Floridamide

**S12** Partial structures of **2** connected by HMBC correlations

**S13** Cytotoxic activity of malyngamide Y

**S14 Table 1.** <sup>1</sup>H and <sup>13</sup>C NMR Data of Malyngamide Y (1) in CDCl<sub>3</sub>

**S15 Table 2.** NMR spectroscopic data for Floridamide at 400 MHz (<sup>1</sup>H) and 150 MHz (<sup>13</sup>C) in CDCl<sub>3</sub>.

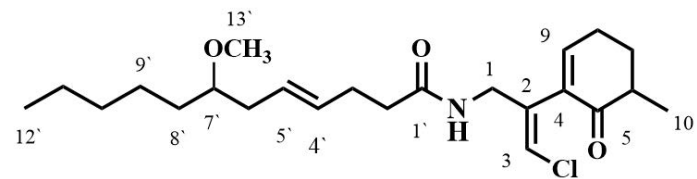

**Malyngamide Y (1)**

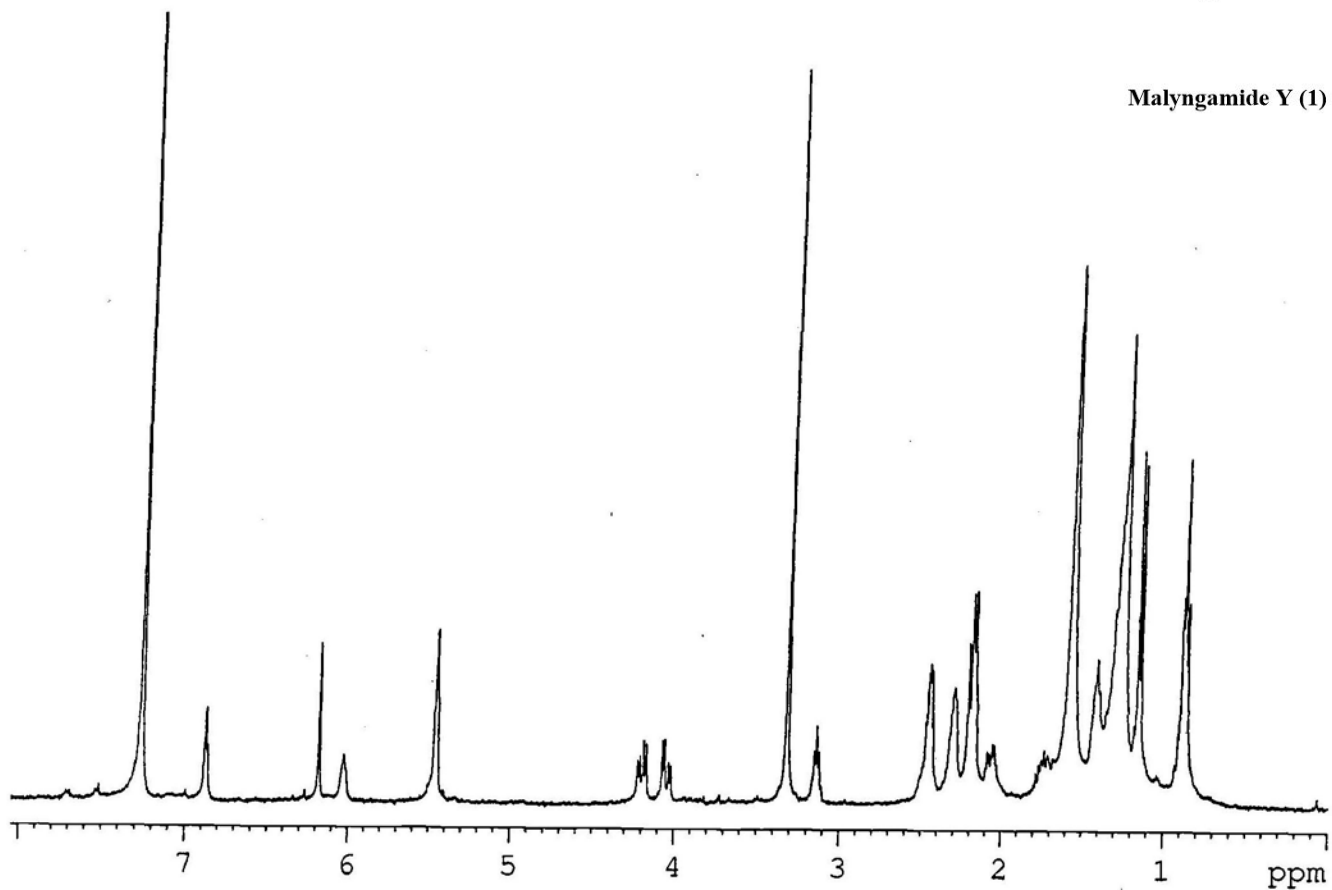

**S1** <sup>1</sup>H NMR spectrum of compound 1 in CDCl<sub>3</sub>

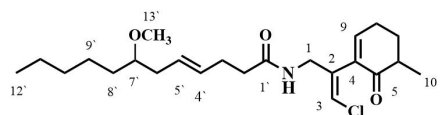

Malyngamide Y (1)

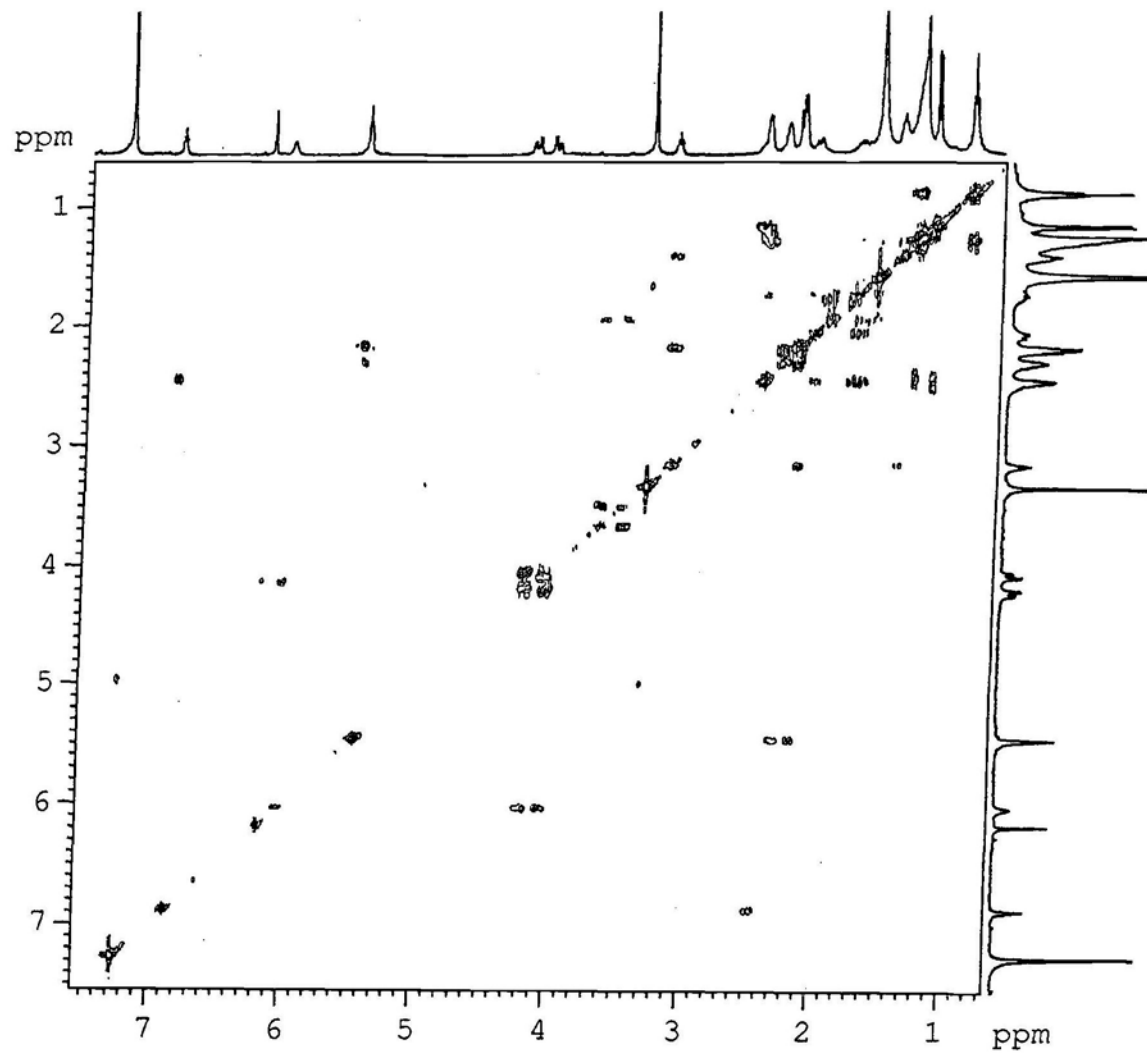

S2 COSY spectrum of compound 1 in  $\text{CDCl}_3$

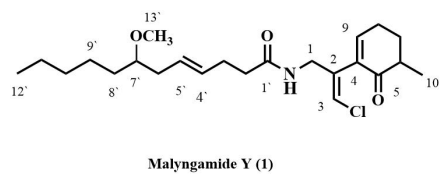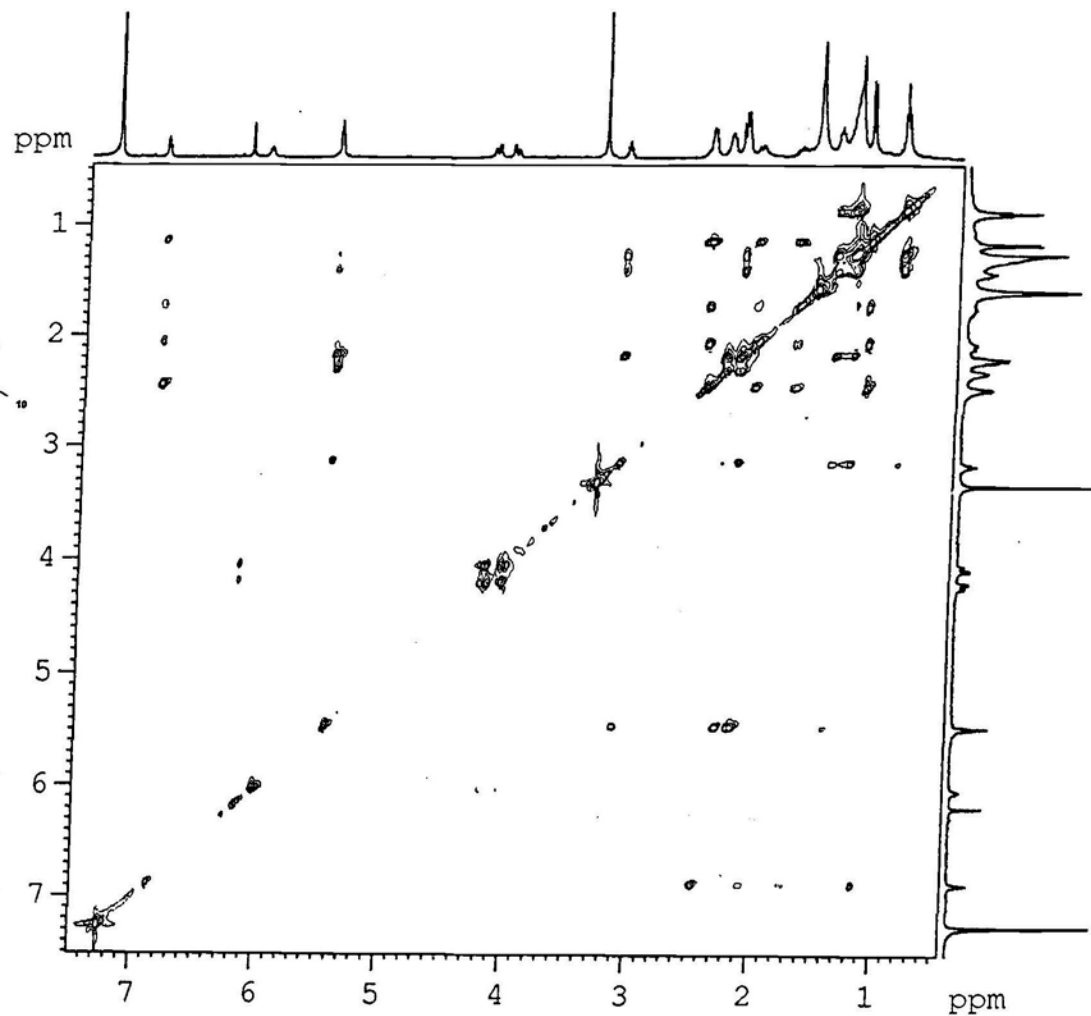

**S3** TOCSY spectrum of compound **1** in CDCl<sub>3</sub>

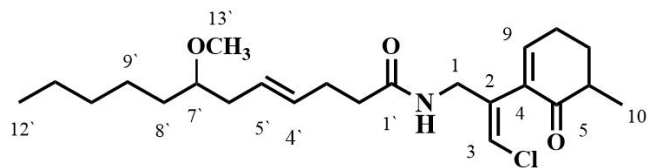

Malyngamide Y (1)

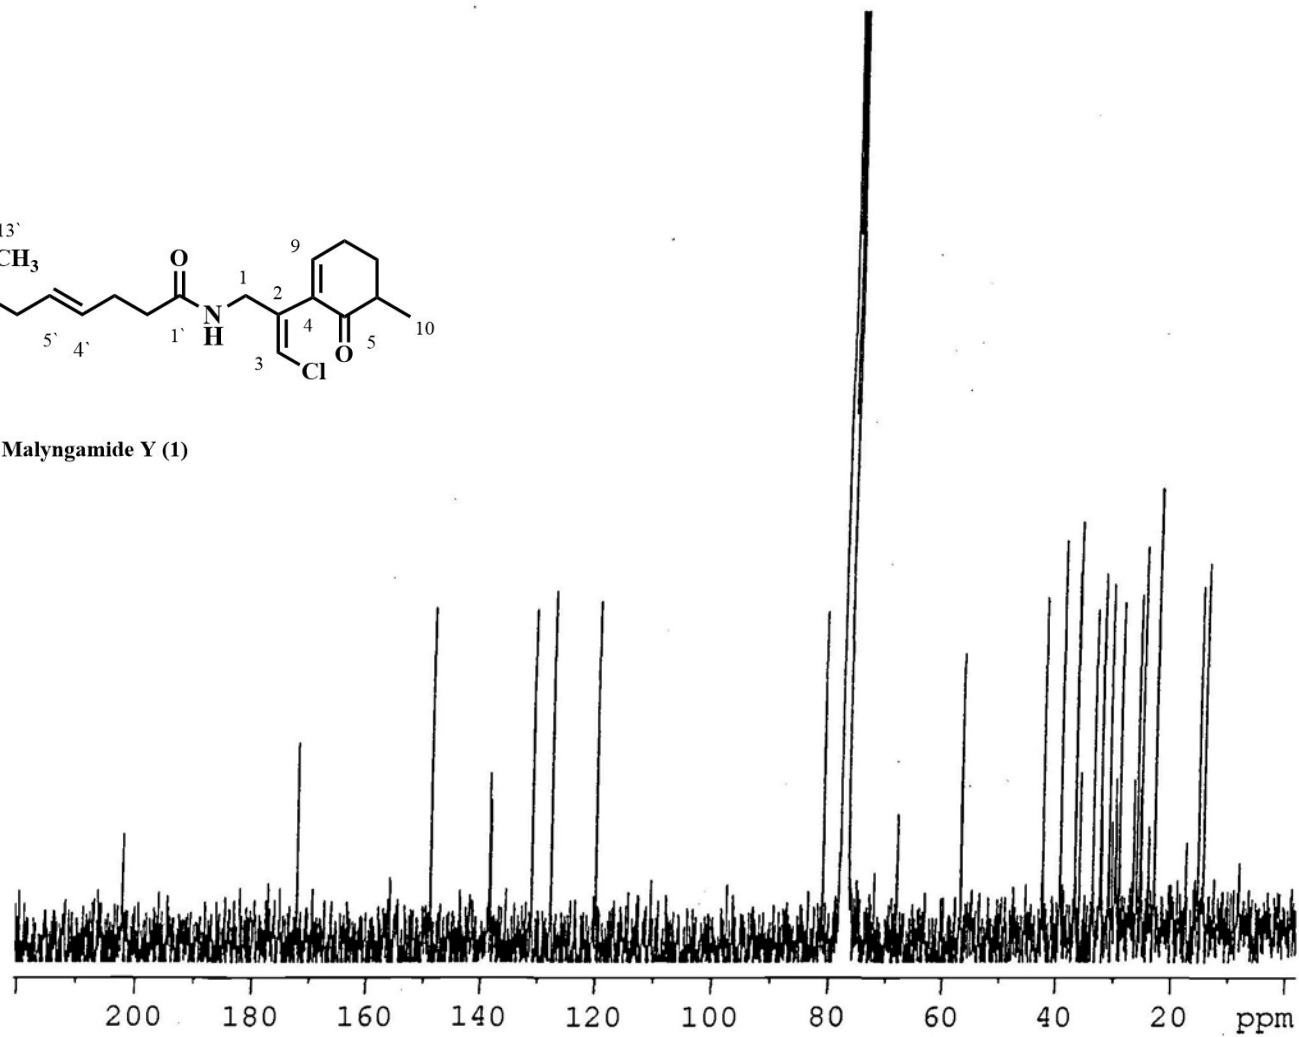

S4 <sup>13</sup>C NMR spectrum of compound 1 in CDCl<sub>3</sub>

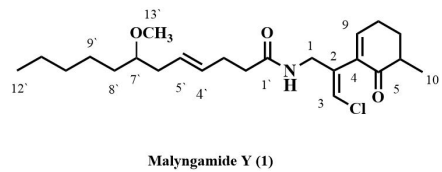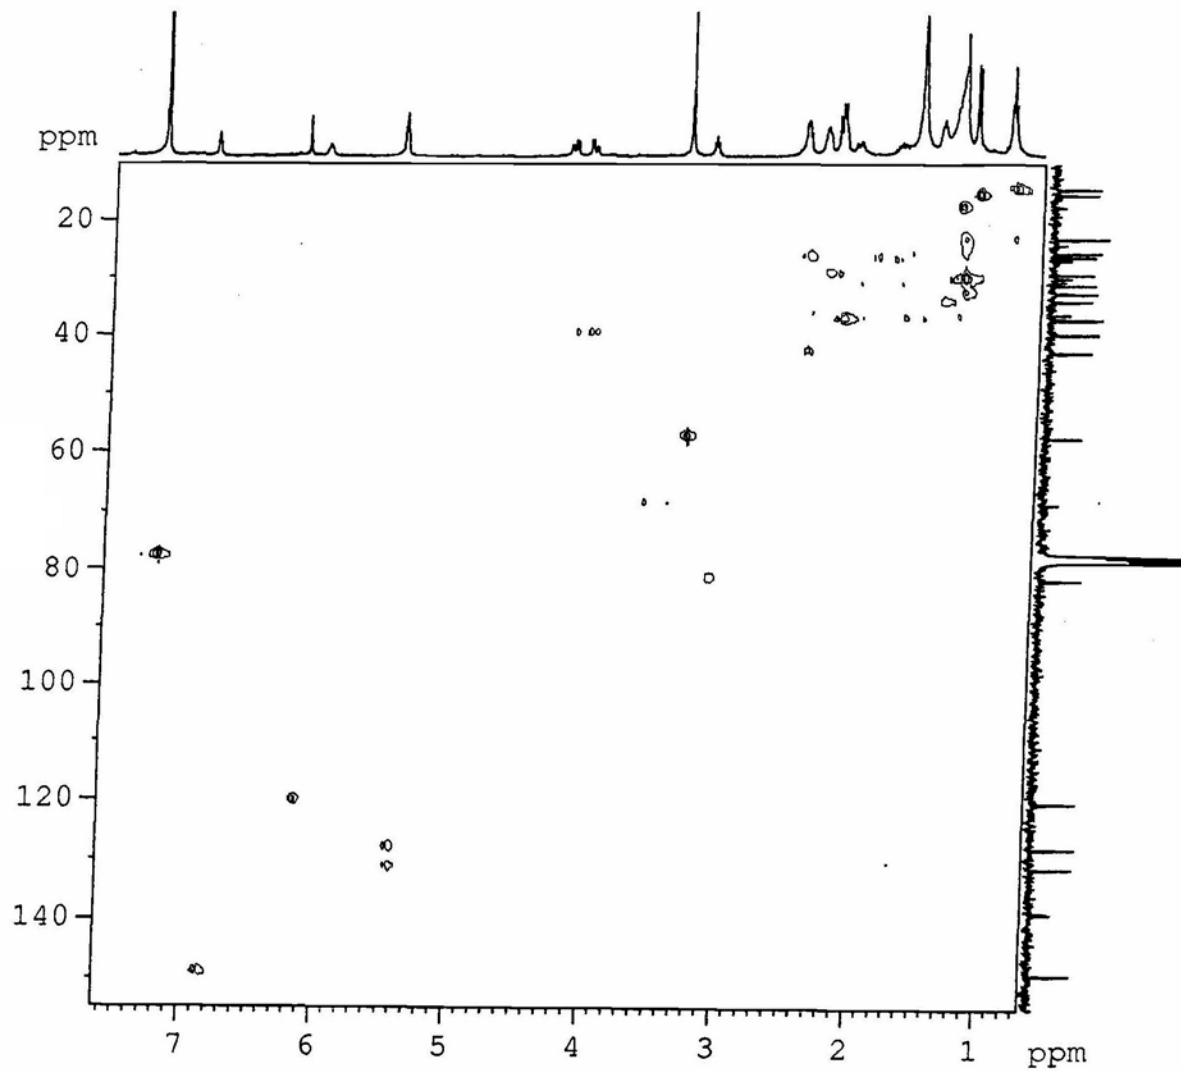

**S5** HSQC spectrum of compound **1** in  $\text{CDCl}_3$

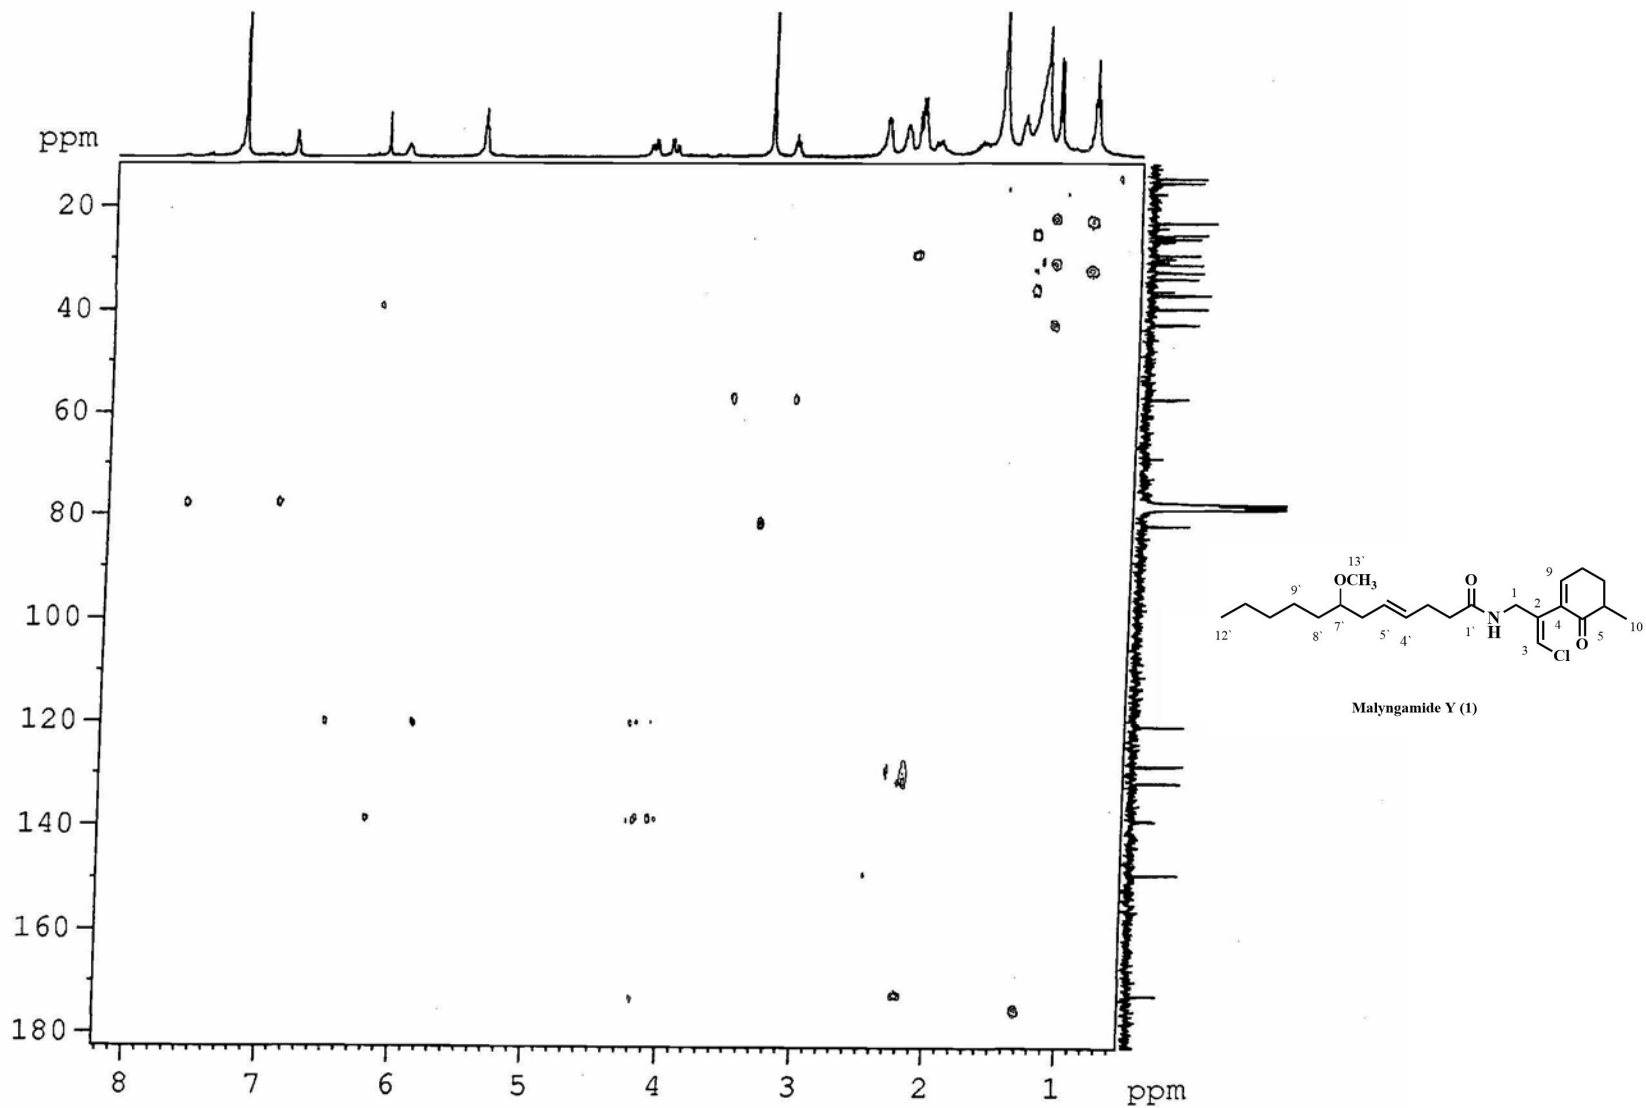

S6 HMBC spectrum of compound 1 in CDCl<sub>3</sub>



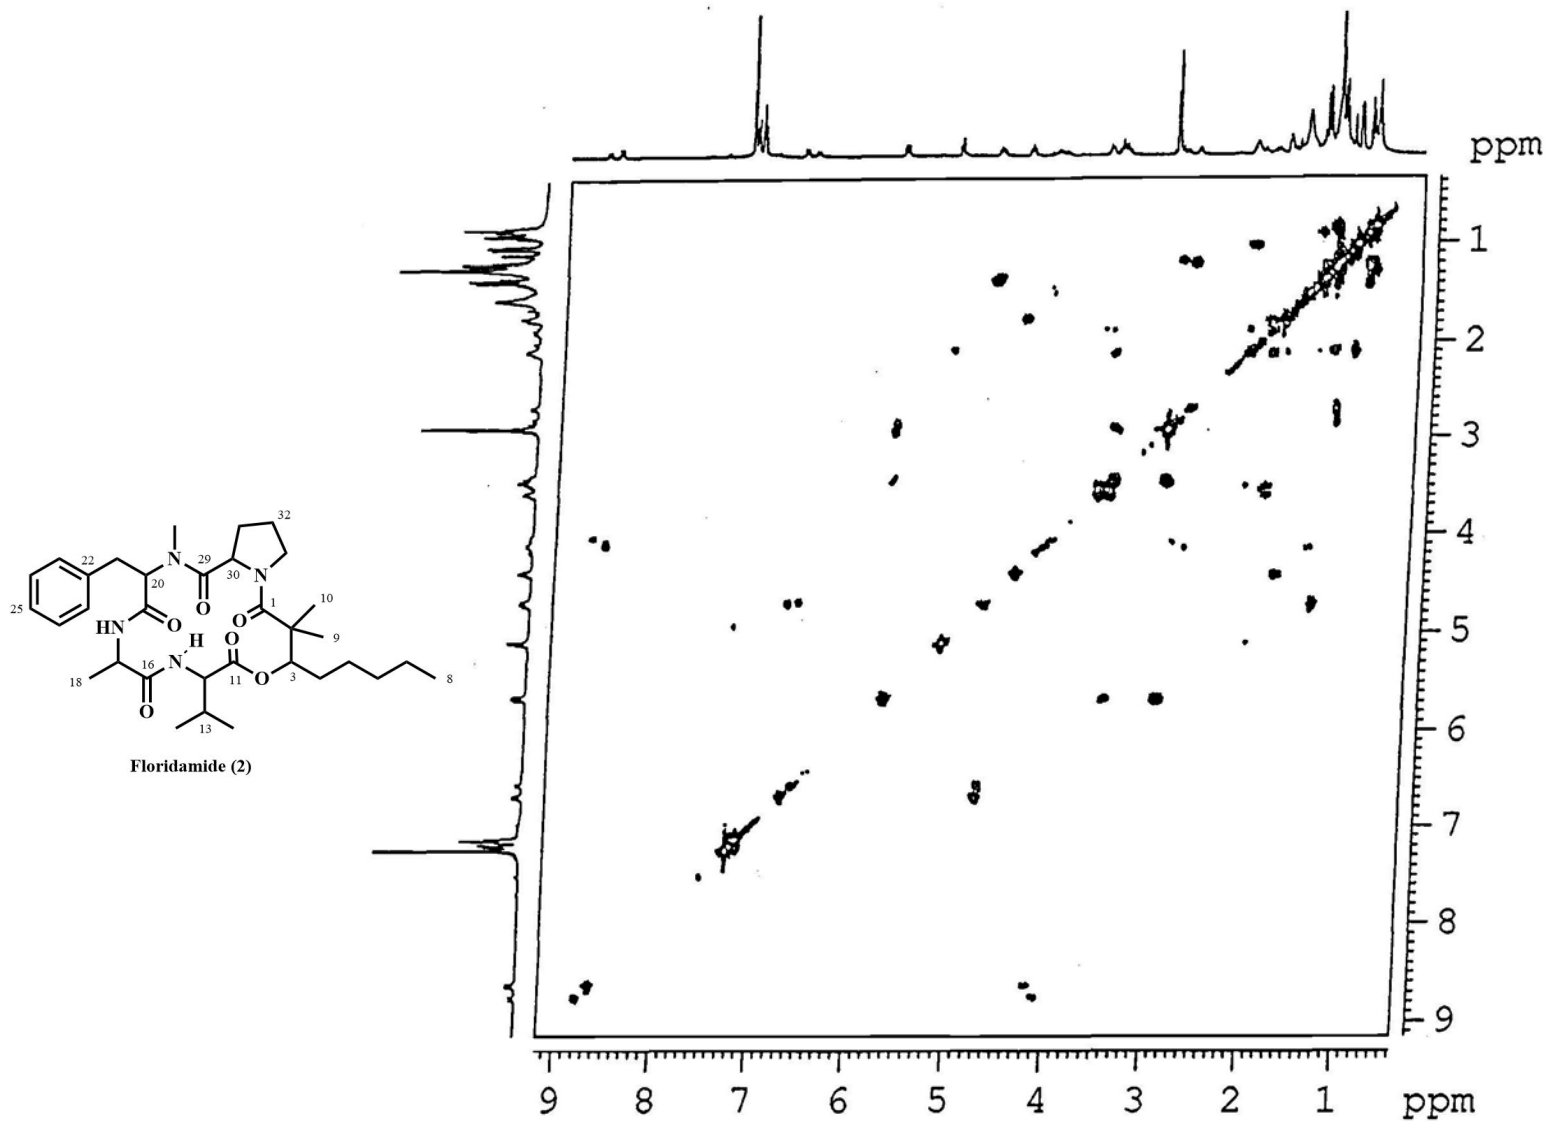

S7 COSY spectrum of compound 2 in CDCl<sub>3</sub>

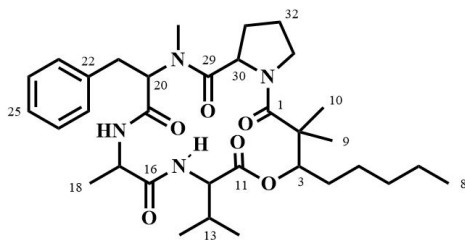

Floridamide (2)

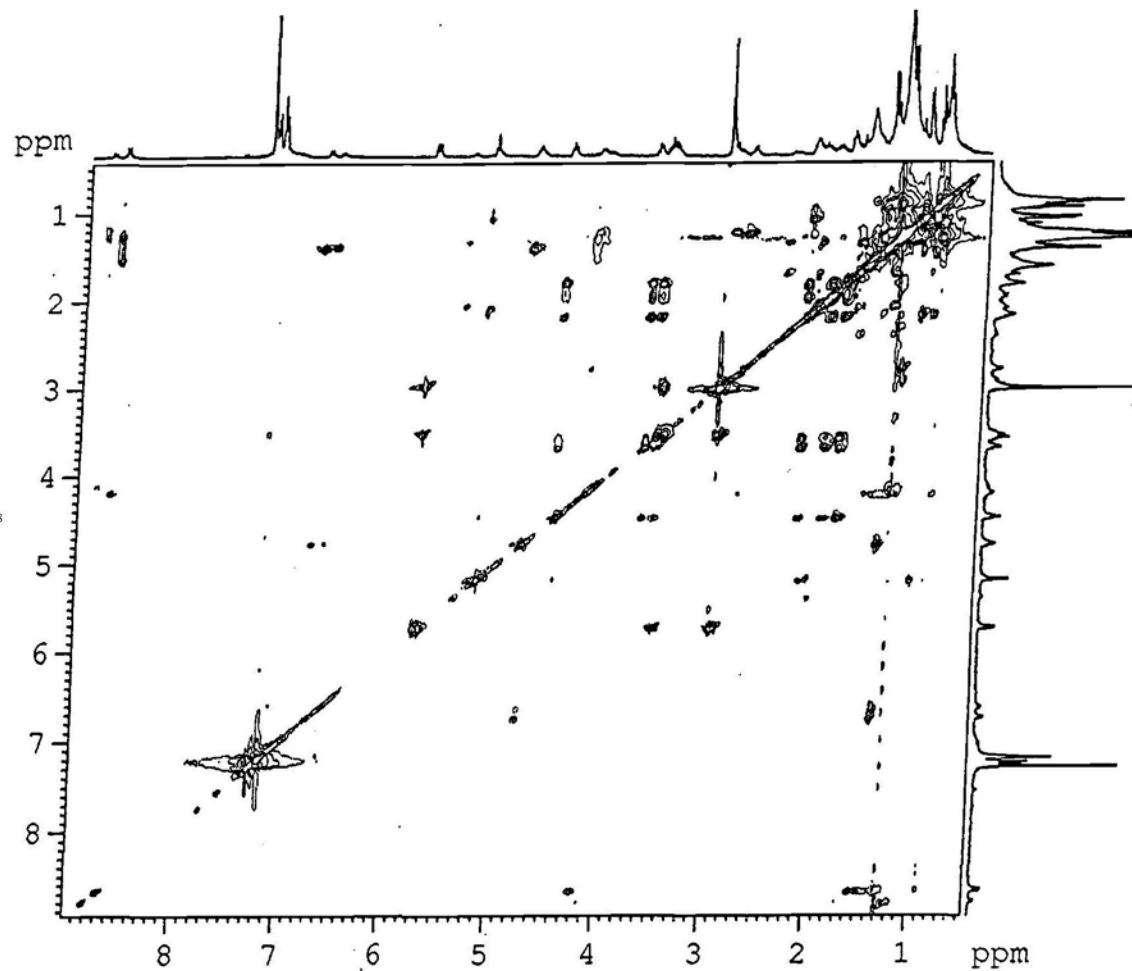

**S8** TOCSY spectrum of compound **2** in  $\text{CDCl}_3$



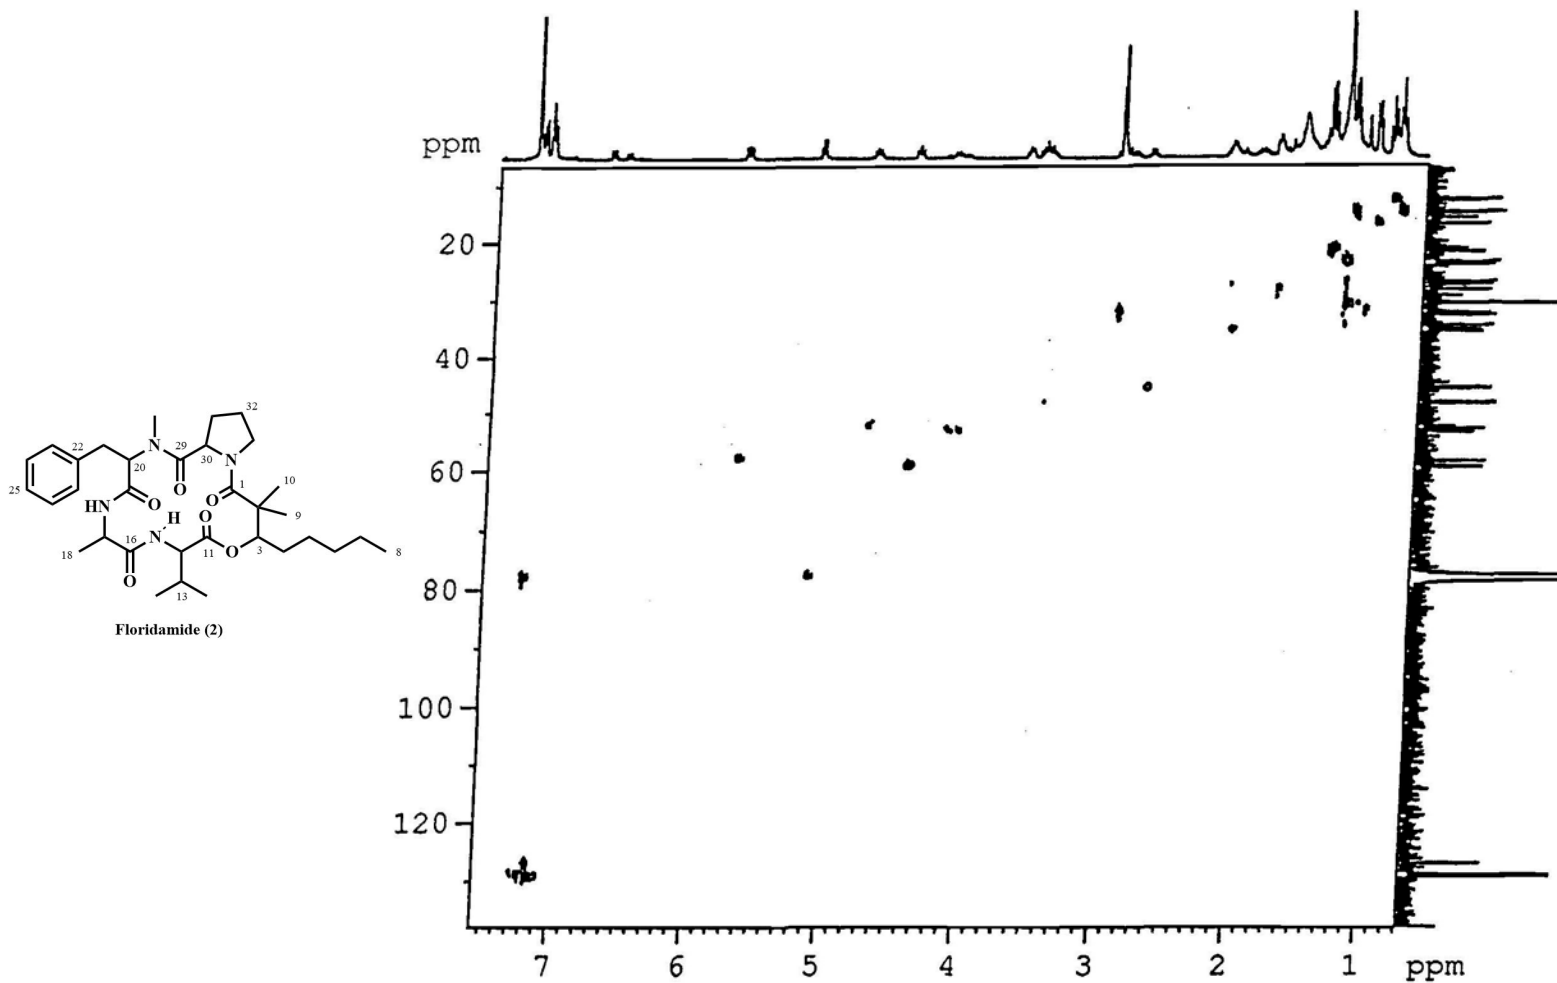

**S10** HSQC spectrum of compound **2** in CDCl<sub>3</sub>

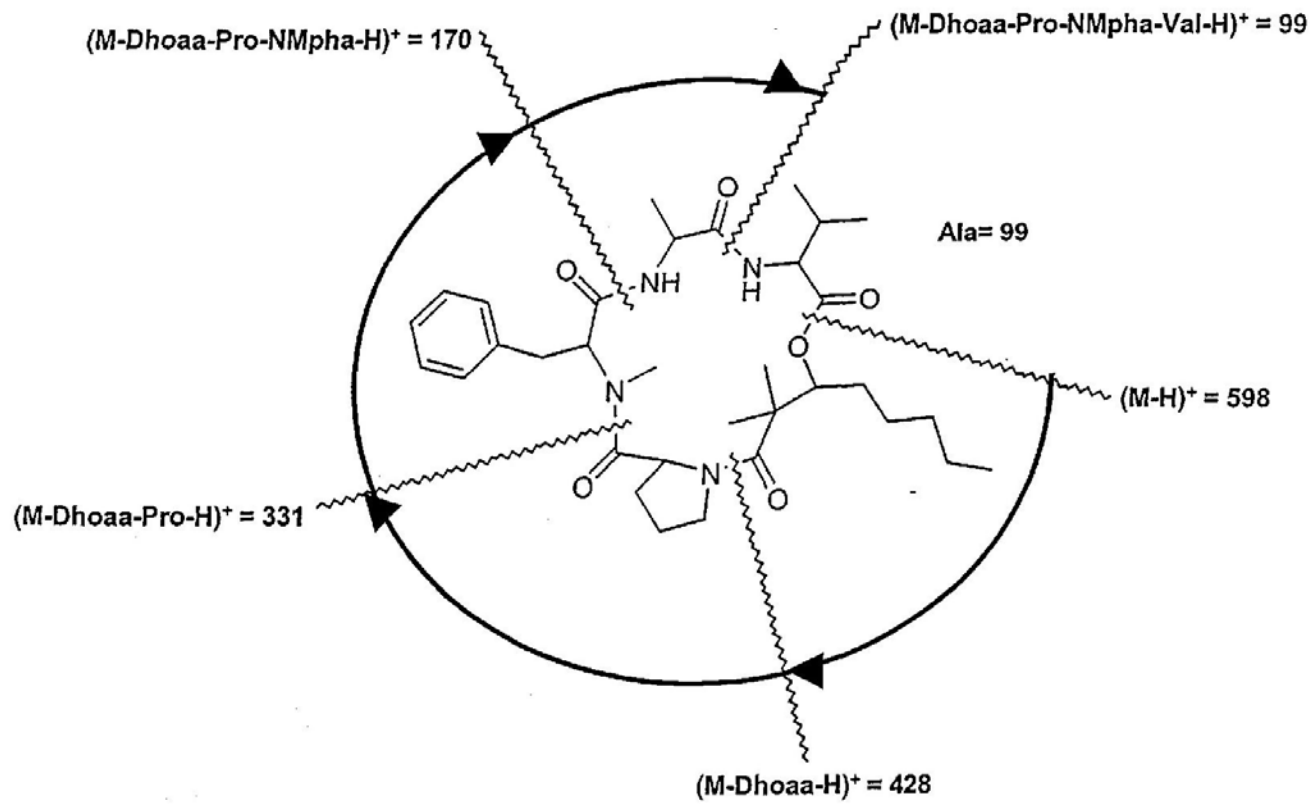

S11 CIMS fragmentation observed for Floridamide

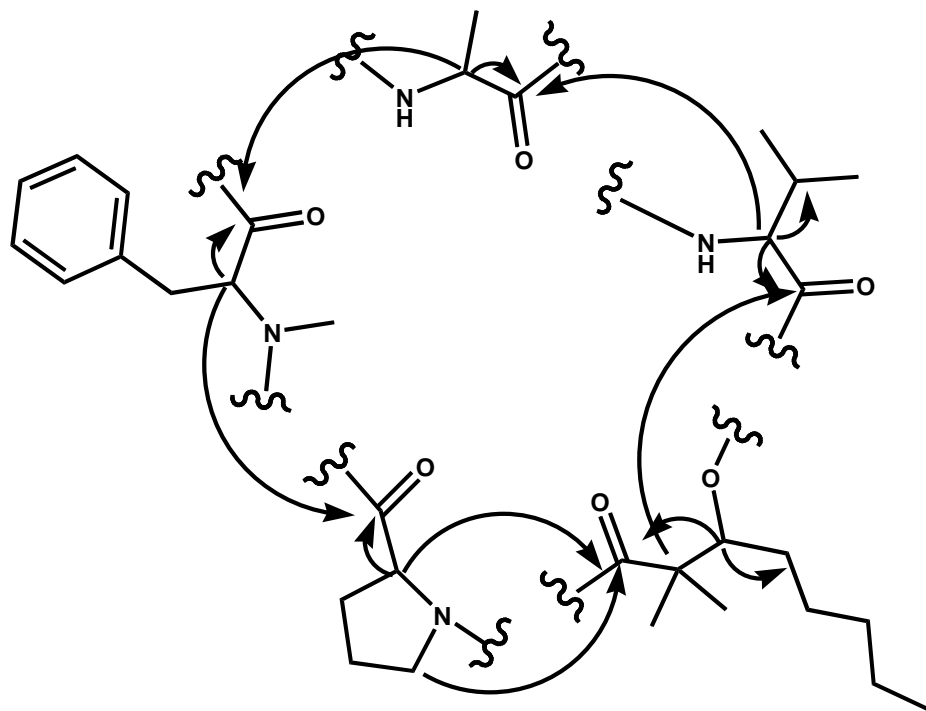

**S12** Partial structures of **2** connected by HMBC correlations.

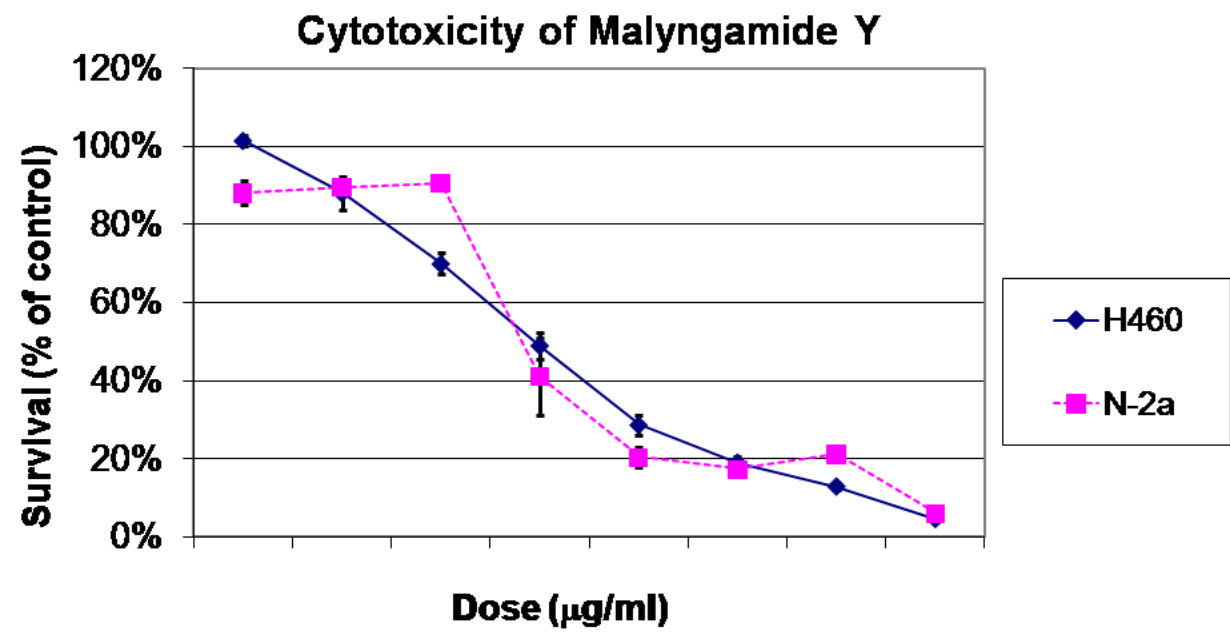

S13 Cytotoxic activity of malyngamide Y

**Table 1.**  $^1\text{H}$  and  $^{13}\text{C}$  NMR Data of Malyngamide **Y** (**1**) in  $\text{CDCl}_3$ <sup>a</sup>

| Position       | $^1\text{H}$ mult $J$ (Hz) | $^{13}\text{C}$      | COSY       | HMBC <sup>b</sup>   |
|----------------|----------------------------|----------------------|------------|---------------------|
| 1 <sub>a</sub> | 4.2 (dd, 4.9, 6.0)         | 39.4 CH <sub>2</sub> | H-3, N-H   | C-2, C-3, C-4, C-1' |
| 1 <sub>b</sub> | 4.0 (dd, 4.9, 6.0)         |                      | H-3, N-H   |                     |
| 2              |                            | 138.7 C              |            |                     |
| 3              | 6.1 (s)                    | 120.1 CH             | H-1        | C-1, C-2, C-4       |
| 4              |                            | 138.4 C              |            |                     |
| 5              |                            | 32.4 C               |            |                     |
| 6              | 2.4 (m)                    | 42.5 CH              | H-7        | C-7, C-5            |
| 7 <sub>a</sub> | 2.0                        | 31.0 CH <sub>2</sub> | H-6, H-8   | C-6, C-8            |
| 7 <sub>b</sub> | 1.7                        |                      | H-6, H-8   |                     |
| 8 <sub>a</sub> | 2.4 (m)                    | 26.1 CH <sub>2</sub> | H-7, H-9   | C-6, C-7, C-9, C-10 |
| 8 <sub>b</sub> | 1.8 (m)                    |                      | H-7, H-9   |                     |
| 9              | 6.8 (m)                    | 130.9 CH             | H-8        | C-5, C-8, C-4       |
| 10             | 1.12                       | 14.6 CH <sub>3</sub> |            | C-5, C-6, C-7, C-8  |
| N-H            | 6.02 (brt, 6.0)            |                      |            |                     |
| 1'             |                            | 172.4 C              |            |                     |
| 2'             | 1.6 (m)                    | 25.4 CH <sub>2</sub> |            | C-1'                |
| 3'             | 2.2 (m)                    | 29.1 CH <sub>2</sub> | H-4'       |                     |
| 4'             | 5.4 (m)                    | 127.0 CH             | H-3', H-5' | C-5', C-3'          |
| 5'             | 5.4 (m)                    | 12.0 CH              | H-4', H-6' | C-6', C-4'          |
| 6'             | 2.15 (m)                   | 36.9 CH <sub>2</sub> | H-5', H-7' | C-5', C-7'          |
| 7'             | 3.12 (m)                   | 81.1 CH              | H-6', H-8' | C-6', C-8', C-12'   |
| 8'             | 1.60 (m)                   | 36.8 CH <sub>2</sub> | H-7'       | C-9', C-10          |
| 9'             | 1.35 (m)                   | 33.7 CH <sub>2</sub> |            | C-8, C-10           |
| 10'            | 1.23 (m)                   | 32.4 CH <sub>2</sub> |            | C-9                 |
| 11'            | 1.22 (m)                   | 23.9 CH <sub>2</sub> | H-12'      | C-9, C12            |
| 12'            | 0.88 (t, 6.8)              | 14.5 CH <sub>3</sub> | H-11'      | C-11                |
| 13'            | 3.4 (s)                    | 56.9 CH <sub>3</sub> |            | C-7'                |

<sup>a</sup> Spectral data reported in ppm.<sup>b</sup> Optimized for 6 Hz.



**Table 2.** NMR spectroscopic data for Floridamide (**2**) at 400 MHz ( $^1\text{H}$ ) and 150 MHz ( $^{13}\text{C}$ ) in  $\text{CDCl}_3$ .<sup>a</sup>

| Position                                            | $^1\text{H}$ | mult | $J$ (Hz)  | $^{13}\text{C}$    | HMBC <sup>b</sup> |
|-----------------------------------------------------|--------------|------|-----------|--------------------|-------------------|
| <b>2,2-dimethyl-3-hydroxy-octanoic acid (Dhoaa)</b> |              |      |           |                    |                   |
| 1                                                   |              |      |           | 169.3 C            |                   |
| 2                                                   |              |      |           | 44.7 C             |                   |
| 3                                                   | 5.13         | dd   | 7.0, 5.5  | 77.2 CH            | 1, 4, 11          |
| 4                                                   | 2.13         | m    |           | 4.0 $\text{CH}_2$  | 3, 5              |
| 5                                                   | 1.77         | m    |           | 27.0 $\text{CH}_2$ | 4, 6              |
| 6                                                   | 1.38         | m    |           | 23.4 $\text{CH}_2$ | 5, 7              |
| 7                                                   | 1.00         | m    |           | 22.9 $\text{CH}_2$ | 8                 |
| 8                                                   | 0.88         | t    | 7.0       | 14.3 $\text{CH}_3$ | 7                 |
| 9                                                   | 0.92         | s    |           | 16.4 $\text{CH}_3$ | 2, 3, 11          |
| 10                                                  | 1.26         | s    |           | 20.8 $\text{CH}_3$ | 2, 3, 11          |
| <b>Val</b>                                          |              |      |           |                    |                   |
| 11                                                  |              |      |           | 173.3 C            |                   |
| 12                                                  | 4.14         | d    | 11.0      | 52.5 CH            | 11, 13, 16        |
| 13                                                  | 2.7          | m    |           | 35.1 CH            | 12, 14, 15        |
| 14                                                  | 1.26         | d    | 6.7       | 14.5 $\text{CH}_3$ | 13                |
| 15                                                  | 1.44         | d    | 6.4       | 12.3 $\text{CH}_3$ | 13                |
| (N-H)                                               | 8.60         | s    |           |                    | 12, 16            |
| <b>Ala</b>                                          |              |      |           |                    |                   |
| 16                                                  |              |      |           | 172.0 C            |                   |
| 17                                                  | 4.76         | m    |           | 51.8 CH            | 16, 18, 19        |
| 18                                                  | 1.36         | d    | 7.2       | 23.4 $\text{CH}_3$ | 17                |
| NH                                                  | 6.7          | d    | brd 5.0   |                    | 17, 19            |
| <b>N-MePhe</b>                                      |              |      |           |                    |                   |
| 19                                                  |              |      |           | 172.9 C            |                   |
| 3                                                   | 5.7          | dd   | 12.1, 4.8 | 57.5 CH            | 19, 21, 4         |
| 21                                                  | 3.45         | dd   | 15.0, 5.0 | 33.8 $\text{CH}_2$ | 20, 22            |
|                                                     | 2.95         | m    |           |                    |                   |
| 22                                                  |              |      |           | 137.0 CH           |                   |
| 23/27                                               | 7.15         | m    |           | 128.6 CH           |                   |
| 24/26                                               | 7.21         | m    |           | 129.0 CH           |                   |
| 25                                                  | 7.16         | m    |           | 126.7 CH           |                   |
| 28 (N- $\text{CH}_3$ )                              | 2.95         | s    |           | 31.7 $\text{CH}_3$ | 20, 29            |
| <b>Pro</b>                                          |              |      |           |                    |                   |
| 4                                                   |              |      |           | 169.0 C            |                   |
| 1                                                   | 4.40         | m    |           | 58.5 CH            | 29, 31, 1         |
| 2                                                   | 2.10         | m    |           | 30.1 $\text{CH}_2$ | 30, 32            |
|                                                     | 1.87         | m    |           |                    |                   |
| 32                                                  | 1.3          | m    |           | 22.9 $\text{CH}_2$ | 31, 33            |
|                                                     | 1.04         | m    |           |                    |                   |
| 33                                                  | 3.60         | m    |           | 47.0 $\text{CH}_2$ | 32, 1             |
|                                                     | 3.50         | m    |           |                    |                   |

<sup>a</sup> Spectral data reported in ppm.

<sup>b</sup> Optimized for 6 Hz.
